# Supplementary material for: Professionals guidance about palliative medicine in chronic heart failure: a mixed-method study
Source: HighWire-hosted journal article supplement (doi:10.1136/bmjspcare-2020-002580), 2020-11-26
Supplement: bmjspcare-2020-002580supp001_data_supplement.pdf [file bmjspcare-2020-002580supp001_data_supplement.pdf]

**Supplementary file 1 Identification of palliative domains, needs and questions in advanced CHF in existing tools (stage 1)**

| <b>Domain number</b> | <b>Domain</b>                 | <b>Helpful input \$</b>                                                                              | <b>Palliative care need (n=50)</b> | <b>Description of need</b>                                              |
|----------------------|-------------------------------|------------------------------------------------------------------------------------------------------|------------------------------------|-------------------------------------------------------------------------|
| 1                    | Physical aspects of care      | SPICT<br>RADPAC<br>NAT:PD-HF<br>CareQoL<br>IPOS<br>NECPAL<br>HefPAC<br>HFNAQ<br>Qualitative research | 1                                  | Physical complaints such as pain, shortness of breath or fatigue        |
|                      |                               |                                                                                                      | 2                                  | Mobility problems                                                       |
| 2                    | Psychological aspects of care | NAT:PD-HF<br>CareQoL<br>IPOS<br>NECPAL<br>HFNAQ<br>Qualitative research                              | 3                                  | Psychological complaints such as gloom, anxiety, irritability, worrying |
|                      |                               |                                                                                                      | 4                                  | Problems related to processing loss of health                           |
|                      |                               |                                                                                                      | 5                                  | Low self-esteem                                                         |

|   |                           |                                                                                                                                                                                                                                                                                                                                                                                                           |    |                                                                            |
|---|---------------------------|-----------------------------------------------------------------------------------------------------------------------------------------------------------------------------------------------------------------------------------------------------------------------------------------------------------------------------------------------------------------------------------------------------------|----|----------------------------------------------------------------------------|
| 3 | Social aspects of care    | NAT:PD-HF<br>CareQoL<br>IPOS<br>HFNAQ<br>Qualitative research                                                                                                                                                                                                                                                                                                                                             | 6  | Loneliness                                                                 |
|   |                           |                                                                                                                                                                                                                                                                                                                                                                                                           | 7  | Lack of understanding by others                                            |
|   |                           |                                                                                                                                                                                                                                                                                                                                                                                                           | 8  | Limited social and activity<br>engagement                                  |
|   |                           |                                                                                                                                                                                                                                                                                                                                                                                                           | 9  | Issues in finding a purposeful way of<br>spending the day                  |
|   |                           |                                                                                                                                                                                                                                                                                                                                                                                                           | 10 | Problems related to processing loss<br>of tasks or different roles at home |
| 4 | Spiritual aspects of care | RADPAC<br>NAT:PD-HF<br>IPOS<br>HFNAQ<br>Qualitative research<br><br>Source: Society of mental<br>caretakers:<br><a href="https://vgvz.nl/wp-content/uploads/2019/08/Indicaties-GV-eerstelijnszorg_Professionals_Definitief_Organisaties_Formulier_20190705.pdf">https://vgvz.nl/wp-content/uploads/2019/08/Indicaties-GV-eerstelijnszorg_Professionals_Definitief_Organisaties_Formulier_20190705.pdf</a> | 11 | Life questions, why-questions or<br>existential questions                  |
|   |                           |                                                                                                                                                                                                                                                                                                                                                                                                           | 12 | Questions about the meaning of life                                        |

|   |                                      |                                                                                                                  |    |                                                                          |
|---|--------------------------------------|------------------------------------------------------------------------------------------------------------------|----|--------------------------------------------------------------------------|
|   |                                      |                                                                                                                  | 13 | The need to talk about spiritual wishes                                  |
| 5 | Care needs nearing the end of life   | NAT:PD-HF<br>Qualitative research*                                                                               | 14 | Concerns about how to manage symptoms / symptom relief                   |
|   |                                      |                                                                                                                  | 15 | Fears of death and dying                                                 |
|   |                                      |                                                                                                                  | 16 | Questions and worries about supportive care for (bereaved) family member |
| 6 | Care needs related to grief and loss | NAT:PD-HF<br>qualitative research                                                                                | 17 | Problems related to processing loss                                      |
|   |                                      |                                                                                                                  | 18 | Needs support with loss and grief                                        |
| 7 | Cultural aspects of care             | NAT:PD-HF<br>Pharos "Lessons from conversations about life and death"/ Roukayya Oueslati<br>Qualitative research | 19 | Cultural or religious background needs attention                         |
|   |                                      |                                                                                                                  | 20 | Language barrier is an issue                                             |
| 8 | Financial aspects of care            | NAT:PD-HF<br>IPOS<br>HFNAQ<br>Qualitative research                                                               | 21 | Financial issues due to loss of work or disease-related expenses         |
|   |                                      |                                                                                                                  | 22 | Housing conditions are not optimal                                       |
|   |                                      |                                                                                                                  | 23 | Problems related to finding and using services                           |
|   |                                      |                                                                                                                  | 24 | Financial, housing or work support needs                                 |

|    |                             |                                                                       |    |                                                                           |
|----|-----------------------------|-----------------------------------------------------------------------|----|---------------------------------------------------------------------------|
|    |                             |                                                                       | 25 | Needs help to find services to discuss financial issues                   |
|    |                             |                                                                       | 26 | Information about which services to call in for financial support         |
| 9  | Medication aspects          | NAT:PD-HF<br>Qualitative research*                                    | 27 | Questions about medication                                                |
|    |                             |                                                                       | 28 | Needs support to know how to use medication                               |
|    |                             |                                                                       | 29 | Worries about medication                                                  |
| 10 | Patient information aspects | SPICT<br>NAT:PD-HF<br>IPOS<br>HefPAC<br>HFNAQ<br>Qualitative research | 30 | Questions or worries about heart failure, the treatment and/or medication |
|    |                             |                                                                       | 31 | Questions about treatment                                                 |
| 11 | Informal care aspects       | SPICT<br>NAT:PD-HF<br>HefPAC<br>Qualitative research*                 | 32 | Worries about informal caregiver burden                                   |
|    |                             |                                                                       | 33 | Information needs of the informal caregiver                               |
|    |                             |                                                                       | 34 | The informal caregiver needs support                                      |

|    |                                                            |                                                         |    |                                                                                                                                                        |
|----|------------------------------------------------------------|---------------------------------------------------------|----|--------------------------------------------------------------------------------------------------------------------------------------------------------|
|    |                                                            |                                                         | 35 | The informal caregiver has health issues                                                                                                               |
|    |                                                            |                                                         | 36 | The informal caregiver needs care                                                                                                                      |
|    |                                                            |                                                         | 37 | Absence of informal caregiver                                                                                                                          |
| 12 | Being in safe hands/<br>structure and processes of<br>care | NAT:PD-HF<br>CareQoL<br>HefPAC<br>Qualitative research* | 38 | Worries about direct available care<br>in case of acute deterioration                                                                                  |
|    |                                                            |                                                         | 39 | Unclear which healthcare<br>professional to contact and<br>accessibility                                                                               |
|    |                                                            |                                                         | 40 | Worries about the continuity of care<br>/information sharing                                                                                           |
|    |                                                            |                                                         | 41 | Unsufficient trust in expertise of<br>healthcare professionals                                                                                         |
| 13 | ACP - Advance care<br>planning aspects                     | SPICT<br>NAT:PD-HF<br>HefPAC<br>Qualitative research    | 42 | Insufficient trust that the life-<br>sustaining treatments and/or end of<br>life care as discussed and agreed<br>will be provided                      |
|    |                                                            |                                                         | 43 | Care planning needs concerning life-<br>sustaining treatments/ end of life<br>care/ role of the legal<br>representative                                |
|    |                                                            |                                                         | 44 | Questions or worries about the<br>future and heart failure                                                                                             |
|    |                                                            |                                                         | 45 | Preferences about how, when and<br>with whom information can be<br>shared and discussed related to life-<br>sustaining treatments/ end of life<br>care |

|    |                               |                       |    |                                                                  |
|----|-------------------------------|-----------------------|----|------------------------------------------------------------------|
| 14 | Aids and equipment aspects    | SNAP                  | 46 | Needs or questions related to aids and home adaptations          |
|    |                               | Qualitative research* | 47 | Needs help to find services related to aids and home adaptations |
| 15 | Getting out and about aspects | SNAP                  | 48 | Issues related to getting out and about and/or caredependency    |
|    |                               | Qualitative research* | 49 | issues related to independency                                   |
|    |                               |                       | 50 | Mobility problems                                                |

§ Systematic review. The following tools were identified: the POS/IPOS (Integrated Palliative care Outcome Scale), the Needs Assessment Tools Progressive Disease – Heart Failure (NAT: PD-HF), the RAdboud indicators for Palliative Care Needs (RADPAC), the Heart Failure Needs Assessment Questionnaire (HFNAQ), the Care related Quality of Life for Chronic Heart Failure Questionnaire (CareQoL CHF), the Heart Failure Palliative Approach to Care (HeFPAC) and the Necesidades Paliativas (NECPAL).

\* Qualitative research resulted in the identification of palliative care needs. In the other cases the qualitative research provided insight in exemplary cases of palliative care needs.

| <b>Domain of support need (n=13)</b> | <b>Description of the support need (n=19)</b>                                                        | <b>Questions (in Dutch)</b>                                                                                                                                                                                                                                                                                                                                                                                                                                                                                                           |
|--------------------------------------|------------------------------------------------------------------------------------------------------|---------------------------------------------------------------------------------------------------------------------------------------------------------------------------------------------------------------------------------------------------------------------------------------------------------------------------------------------------------------------------------------------------------------------------------------------------------------------------------------------------------------------------------------|
| Physical aspects                     | Physical complaints such as pain, shortness of breath, fatigue                                       | <ul style="list-style-type: none"> <li>▪ Hebt u last van kortademigheid, vermoeidheid, pijn of andere lichamelijke klachten die u belemmeren bij het doen van uw dagelijkse bezigheden (zoals uw hobby (zorgverlener vul evt. hobby in))?</li> <li>▪ Hebt u last van kortademigheid, vermoeidheid, pijn of andere lichamelijke klachten waar u zich zorgen over maakt?</li> <li>▪ Wilt u dat er meer gedaan wordt aan uw lichamelijke klachten zoals pijn, kortademigheid, vermoeidheid of andere klachten dan nu gebeurt?</li> </ul> |
| Psychological aspects                | Psychological complaints such as gloom, anxiety, irritability, worrying                              | <ul style="list-style-type: none"> <li>▪ Hebt u last van somberheid, angst, prikkelbaarheid of piekeren?</li> </ul>                                                                                                                                                                                                                                                                                                                                                                                                                   |
| Care needs related to grief and loss | Problems related to processing loss of health, function at work or limitations in leisure activities | <ul style="list-style-type: none"> <li>▪ Hebt u hulp nodig bij het accepteren van uw ziekte, uw beperkingen of verlies van werk of hobby?</li> <li>▪ Heeft u begeleiding nodig bij positief leven met hartfalen?</li> <li>▪ Heeft u begeleiding nodig bij het omgaan met hartfalen?</li> </ul>                                                                                                                                                                                                                                        |
| Social aspects                       | Loneliness                                                                                           | <ul style="list-style-type: none"> <li>▪ Hebt u het gevoel er alleen voor te staan?</li> <li>▪ Heeft u last van eenzaamheid?</li> </ul>                                                                                                                                                                                                                                                                                                                                                                                               |
| Social aspects                       | Lack of understanding by others                                                                      | <ul style="list-style-type: none"> <li>▪ Hebt u het gevoel dat uw naasten uw situatie begrijpen?</li> </ul>                                                                                                                                                                                                                                                                                                                                                                                                                           |

|                                  |                                                                                |                                                                                                                                                                                                                    |
|----------------------------------|--------------------------------------------------------------------------------|--------------------------------------------------------------------------------------------------------------------------------------------------------------------------------------------------------------------|
|                                  |                                                                                | <ul style="list-style-type: none"> <li>▪ Voelt u zich begrepen door de mensen in uw omgeving?</li> </ul>                                                                                                           |
| Social aspects                   | Issues in finding a purposeful way of spending the day                         | <ul style="list-style-type: none"> <li>▪ Hebt u ondersteuning nodig om de dingen te kunnen doen die u graag doet?</li> <li>▪ Hebt u hulp nodig om de dingen te kunnen doen die u graag doet?</li> </ul>            |
| Spiritual aspects                | Life questions, why-questions or existential questions                         | <ul style="list-style-type: none"> <li>▪ Wilt u graag met iemand praten over levensvragen of 'waarom'-vragen?</li> </ul>                                                                                           |
| Cultural background              | Cultural or religious background needs attention                               | <ul style="list-style-type: none"> <li>▪ Is er iets over uw culturele achtergrond of geloof dat ik moet weten om u de juiste zorg te geven?</li> </ul>                                                             |
| Financial issues related to care | Financial issues related to job loss/income and/or to disease-related expenses | <ul style="list-style-type: none"> <li>▪ Hebt u geldzorgen door uw ziekte?</li> <li>▪ Maakt u zich zorgen over uw toekomst vanwege geldzorgen?</li> </ul>                                                          |
| Issues related to treatment      | Questions or issues related to the disease and the treatment                   | <ul style="list-style-type: none"> <li>▪ Hebt u vragen of zorgen over uw ziekte en/of uw behandeling?</li> </ul>                                                                                                   |
| Informal caregiver aspects       | Informal caregiver burden                                                      | <ul style="list-style-type: none"> <li>▪ Vraag aan Patiënt: Heeft uw naaste ondersteuning nodig bij het zorgen voor u?</li> <li>▪ Vraag aan Naaste: Voelt u zich belast door het zorgen voor uw naaste?</li> </ul> |



|                            |                                                                                                        |                                                                                                                                                                                                                                                                                                                                                                                                                                          |
|----------------------------|--------------------------------------------------------------------------------------------------------|------------------------------------------------------------------------------------------------------------------------------------------------------------------------------------------------------------------------------------------------------------------------------------------------------------------------------------------------------------------------------------------------------------------------------------------|
| Informal caregiver aspects | Information needs of the informal caregiver                                                            | <ul style="list-style-type: none"> <li>▪ Vraag aan Naaste: Hebt u behoefte aan meer uitleg over de ziekte, behandeling of beschikbare voorzieningen?</li> <li>▪ Vraag aan Naaste: Heeft u behoefte aan informatie over wat het hartfalen in de toekomst voor uw naaste zou kunnen betekenen?</li> <li>▪ Vraag aan Patiënt: Heeft uw naaste behoefte aan meer uitleg over de ziekte, behandeling of beschikbare voorzieningen?</li> </ul> |
| Informal caregiver aspects | Absence of informal caregiver                                                                          | <ul style="list-style-type: none"> <li>▪ Is er iemand in uw omgeving die voor u kan zorgen als dat nodig is?</li> </ul>                                                                                                                                                                                                                                                                                                                  |
| Feeling safe and cared for | Issues related to direct available care in case of acute deterioration                                 | <ul style="list-style-type: none"> <li>▪ Weet u welke zorgverlener u kunt bellen als u opeens erger ziek wordt?</li> </ul>                                                                                                                                                                                                                                                                                                               |
| Advance care planning      | Making agreements about life-sustaining treatments/ end of life care/ role of the legal representative | <ul style="list-style-type: none"> <li>▪ Weten uw artsen en naasten welke behandeling en zorg u wilt als u ernstig ziek wordt?</li> <li>▪ Wilt u met uw arts(en) of naasten praten over de behandeling die u wilt als u ernstig ziek wordt?</li> </ul>                                                                                                                                                                                   |
| Advance care planning      | Questions or issues related to living with heart failure in the future                                 | <ul style="list-style-type: none"> <li>▪ Hebt u vragen of zorgen over uw toekomst met hartfalen?</li> <li>▪ Wilt u met uw arts praten over wat u kunt verwachten van uw toekomst met uw ziekte?</li> </ul>                                                                                                                                                                                                                               |
| Aids and equipment         | Needs or questions related to aids and home adaptations                                                | <ul style="list-style-type: none"> <li>▪ Hebt u hulp nodig bij het krijgen van de juiste hulpmiddelen of aanpassingen in huis?</li> <li>▪ Heeft u advies nodig over welke hulpmiddelen er beschikbaar zijn die u zouden kunnen helpen?</li> </ul>                                                                                                                                                                                        |

|                       |                   |                                                                                                                                                                                             |
|-----------------------|-------------------|---------------------------------------------------------------------------------------------------------------------------------------------------------------------------------------------|
| Getting out and about | Care dependance   | <ul style="list-style-type: none"><li>▪ Hebt u meer hulp nodig bij wassen, aankleden, boodschappen doen of het huishouden?</li></ul>                                                        |
| Getting out and about | Mobility problems | <ul style="list-style-type: none"><li>▪ Hebt u problemen met lopen, fietsen of autorijden?</li><li>▪ Hebt u hulp nodig bij u verplaatsen, zoals bij lopen, fietsen of autorijden?</li></ul> |
